# Supplementary material for: Bud-Poplar-Extract-Embedded Chitosan Films as Multifunctional Wound Healing Dressing
Source: MDPI journal article supplement (doi:10.3390/molecules27227757), 2022-11-10
Supplement: s1 [file s1]

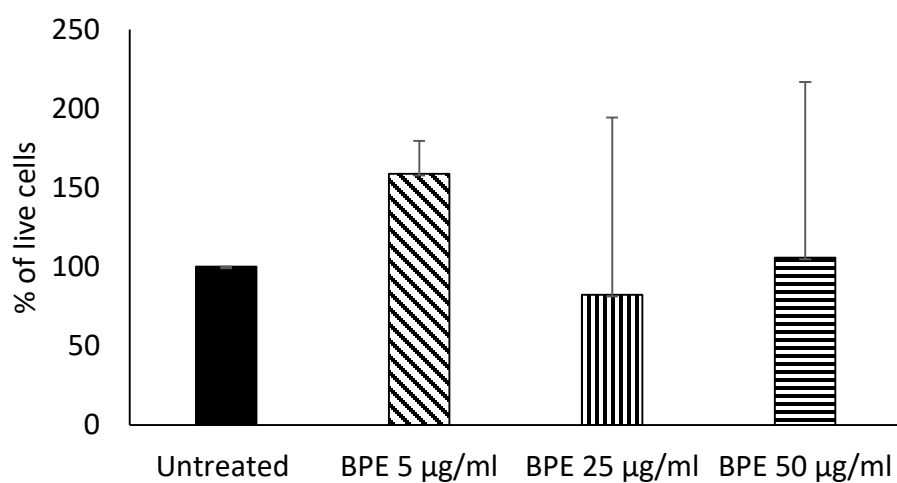

### Pre-treatment

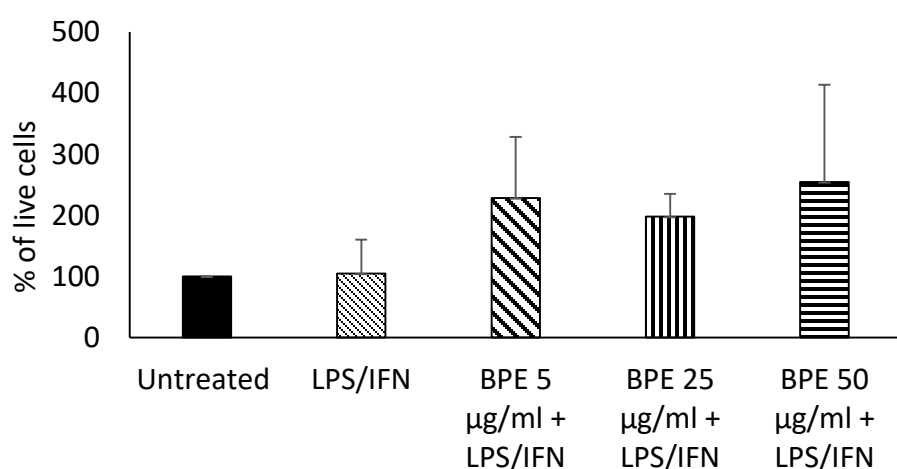

### Post-treatment

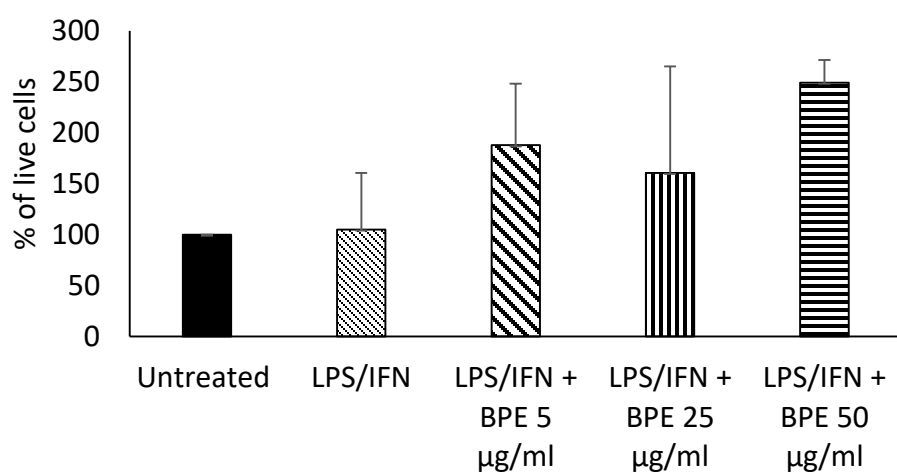

**Figure S1.** Citotoxicity of BPE on human monocyte-macrophages. Results are expressed as percentage of live cells with respect to untreated cells, considered 100. The results are expressed as mean  $\pm$  SD of three different measures.
